# Supplementary material for: Bending of purple membranes in dependence on the pH analyzed by AFM and single molecule force spectroscopy
Source: Royal Society of Chemistry journal article supplement (doi:10.1039/b919729j), 2010-01-01
Supplement: b919729j.pdf [file b919729j.pdf]

### Supplemental Data

# Number of dataset, A Area of cross-section, w half width of Gaussian curve,  $y_0$  offset,  $R^2$  coefficient of determination,  $y''$  curvature at apex of membrane

$$5 \quad y = y_0 + \frac{A}{w \cdot \sqrt{\frac{\pi}{2}}} \cdot e^{-2\left(\frac{x-x_c}{w}\right)^2} \quad (1)$$

$$y'' = -\frac{4A}{w^3 \cdot \sqrt{\frac{\pi}{2}}} \quad \text{for} \quad x = x_c = 0 \quad (2)$$

Table 3 D85N

| #  | A [nm <sup>2</sup> ] | w [nm] | $y_0$ [nm] | $R^2$ | $y''$ [ $\mu\text{m}^{-1}$ ] |
|----|----------------------|--------|------------|-------|------------------------------|
| 1  | 6,66E+03             | 130    | -1,16      | 0,99  | -9,67                        |
| 2  | 3,43E+03             | 95,7   | -1,27      | 0,99  | -12,50                       |
| 3  | 1,27E+04             | 185    | -4,59      | 0,99  | -6,40                        |
| 4  | 7,77E+03             | 124    | -6,06      | 0,99  | -13,00                       |
| 5  | 3,45E+04             | 350    | -5,74      | 0,99  | -2,57                        |
| 6  | 5,01E+03             | 182    | 1,63       | 0,96  | -2,65                        |
| 7  | 5,01E+04             | 424    | -2,83      | 1,00  | -2,10                        |
| 8  | 6,73E+04             | 506    | 10,29      | 0,99  | -1,66                        |
| 9  | 6,27E+04             | 517    | 2,52       | 0,97  | -1,45                        |
| 10 | 5,54E+04             | 889    | 4,98       | 0,94  | -0,25                        |
| 11 | 1,85E+05             | 937    | -31,82     | 1,00  | -0,72                        |
| 12 | 3,23E+05             | 986    | -34,02     | 1,00  | -1,08                        |
| 13 | 1,89E+06             | 2450   | -35,1      | 0,98  | -0,41                        |

Table 4 D85T

| #  | A [nm <sup>2</sup> ] | w [nm] | $y_0$ [nm] | $R^2$ | $y''$ [ $\mu\text{m}^{-1}$ ] |
|----|----------------------|--------|------------|-------|------------------------------|
| 1  | 5,97E+04             | 588    | 3,89       | 0,997 | -0,937                       |
| 2  | 6,19E+04             | 635    | 8,03       | 0,997 | -0,772                       |
| 3  | 1,06E+05             | 888    | 10,70      | 0,994 | -0,483                       |
| 4  | 1,13E+05             | 755    | 8,80       | 0,990 | -0,838                       |
| 5  | 1,48E+05             | 735    | 20,70      | 0,996 | -1,190                       |
| 6  | 1,81E+05             | 915    | 1,25       | 0,987 | -0,754                       |
| 7  | 2,61E+05             | 652    | 27,20      | 0,990 | -3,010                       |
| 8  | 3,30E+05             | 790    | -9,71      | 0,984 | -2,140                       |
| 9  | 4,22E+05             | 1250   | -16,10     | 0,995 | -0,690                       |
| 10 | 5,71E+05             | 1010   | -54,30     | 0,993 | -1,770                       |
| 12 | 9,48E+04             | 531    | -14,40     | 0,997 | -2,020                       |
| 13 | 5,41E+05             | 1200   | -48,80     | 0,992 | -0,999                       |
| 14 | 2,22E+04             | 458    | 7,59       | 0,991 | -0,737                       |
| 15 | 9,24E+03             | 247    | -0,87      | 0,962 | -1,960                       |
| 16 | 2,69E+04             | 482    | 5,17       | 0,976 | -0,767                       |
| 17 | 3,12E+04             | 514    | -6,41      | 0,976 | -0,733                       |
| 18 | 1,02E+04             | 280    | 8,23       | 0,913 | -1,360                       |
| 19 | 1,80E+04             | 313    | 14,70      | 0,985 | -1,870                       |
| 20 | 9,62E+03             | 218    | 9,47       | 0,974 | -2,960                       |
| 21 | 7,68E+03             | 220    | 12,50      | 0,943 | -2,300                       |
| 22 | 3,27E+04             | 369    | 11,80      | 0,996 | -2,080                       |
| 23 | 1,43E+04             | 251    | 12,70      | 0,991 | -2,890                       |
| 24 | 7,99E+03             | 160    | 9,63       | 0,995 | -6,230                       |
| 25 | 8,26E+03             | 148    | 9,17       | 0,990 | -8,130                       |
| 26 | 9,26E+03             | 155    | 9,22       | 0,986 | -7,940                       |
| 27 | 1,54E+04             | 280    | 6,49       | 0,977 | -2,240                       |
| 28 | 1,54E+04             | 219    | 2,55       | 0,992 | -4,680                       |
| 29 | 4,15E+04             | 526    | 3,26       | 0,992 | -0,910                       |
| 30 | 1,57E+05             | 786    | -14,00     | 0,994 | -1,030                       |
| 31 | 1,64E+04             | 352    | -0,97      | 0,952 | -1,200                       |
| 32 | 1,46E+05             | 804    | -9,72      | 0,988 | -0,897                       |
| 33 | 2,34E+04             | 373    | -5,41      | 0,965 | -1,440                       |
| 34 | 7,29E+04             | 597    | 1,76       | 0,979 | -1,090                       |
| 35 | 1,49E+04             | 228    | 10,80      | 0,992 | -4,010                       |
| 36 | 1,20E+04             | 255    | 8,11       | 0,959 | -2,310                       |
| 37 | 2,00E+05             | 1090   | 8,04       | 0,997 | -0,493                       |
| 38 | 2,98E+04             | 364    | 0,00       | 0,985 | -1,970                       |
| 39 | 1,27E+05             | 614    | -1,43      | 0,999 | -1,750                       |
| 40 | 3,73E+05             | 953    | -14,80     | 0,999 | -1,380                       |
| 41 | 1,13E+05             | 645    | -1,05      | 0,997 | -1,340                       |
| 42 | 1,51E+05             | 650    | -10,30     | 0,998 | -1,750                       |
| 43 | 7,36E+04             | 526    | -4,61      | 0,998 | -1,610                       |
| 44 | 1,05E+05             | 1030   | 2,46       | 0,977 | -3,070                       |
